# Supplementary material for: MALAT1 expression is associated with aggressive behavior in indolent B-cell neoplasms
Source: PubMed Central journal article supplement (PMC10558466; doi:10.1038/s41598-023-44174-8), 2023-10-06

## ***SUPPLEMENTARY FIGURES***

### ***MALAT1 Expression is Associated with Aggressive Behavior in Indolent B-Cell Neoplasms***

Elena María Fernández-Garnacho, Ferran Nadeu, Silvia Martín, Pablo Mozas, Andrea Rivero, Julio Delgado, Eva Giné, Armando López-Guillermo, Martí Duran-Ferrer, Itziar Salaverria, Cristina López, Sílvia Beà, Santiago Demajo, Pedro Jares, Xose S Puente, José Ignacio Martín-Subero, Elías Campo, Lluís Hernández

(a)

**TTT (Maxstat)**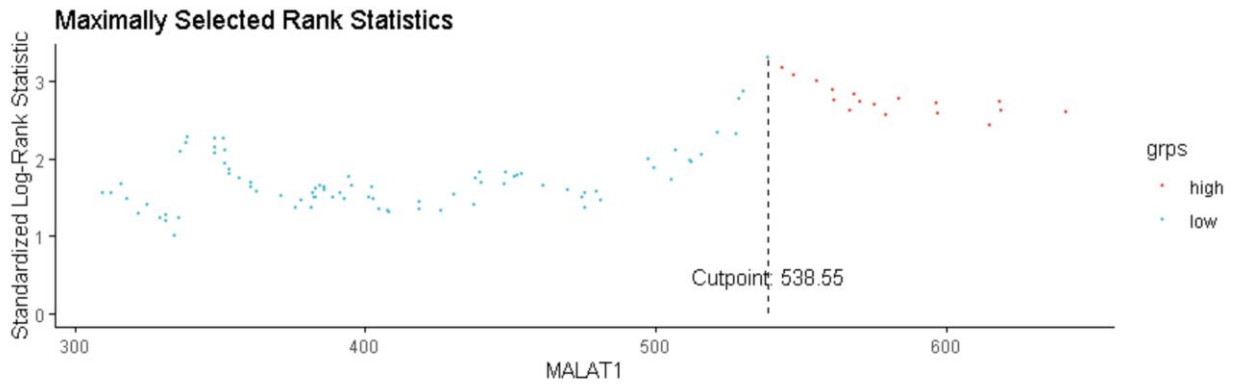

(b)

**OS (Maxstat)**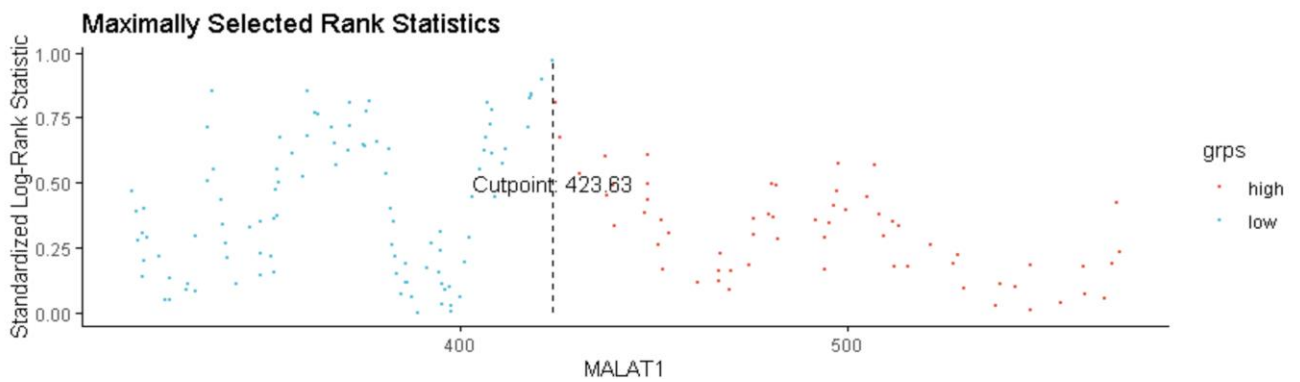



(a)

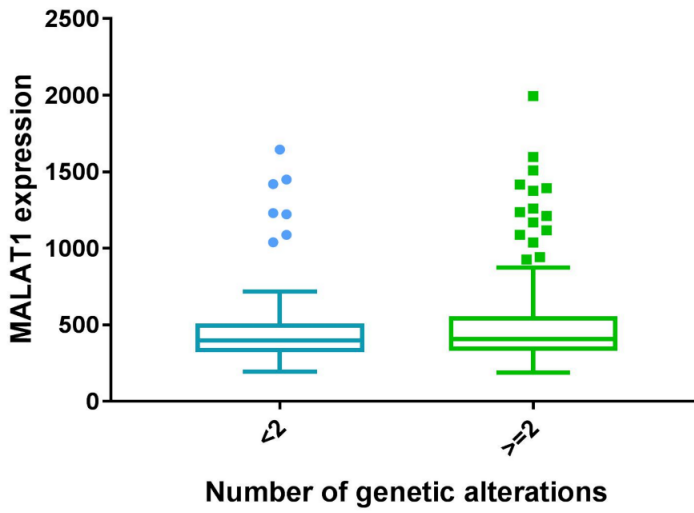

(b)

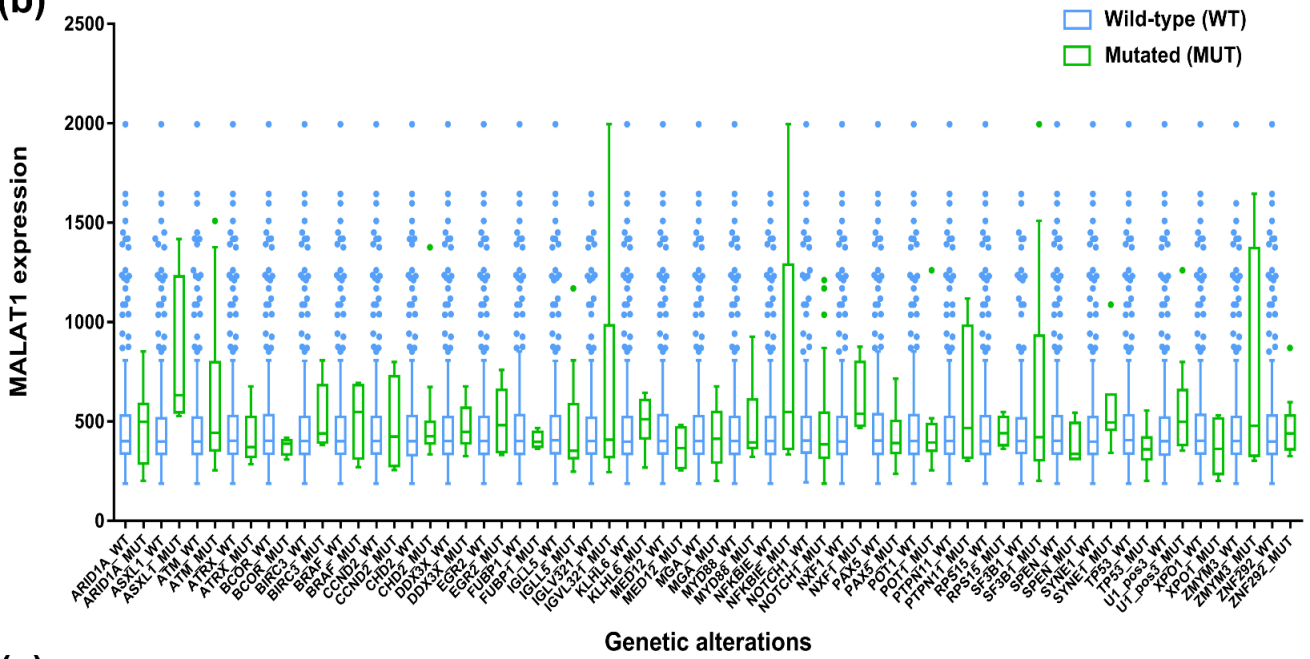

(c)

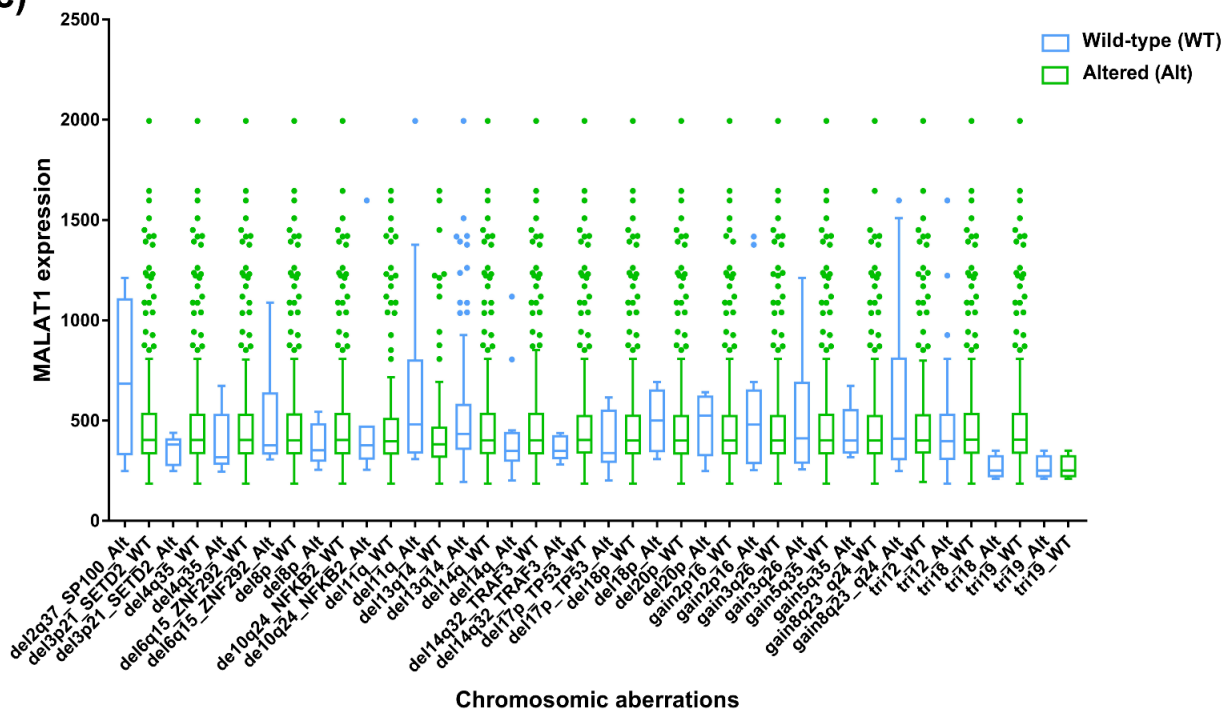

(a)

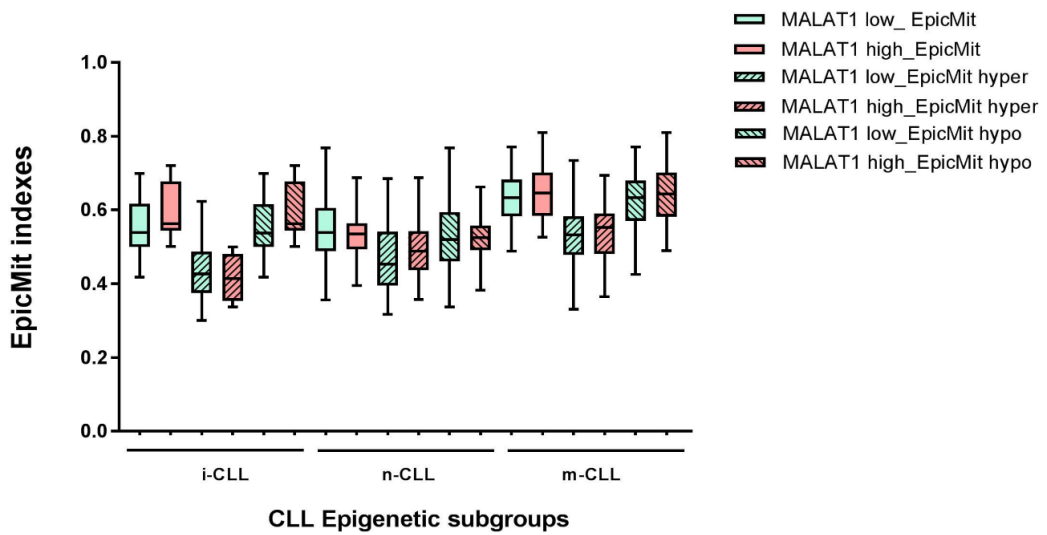

(b)

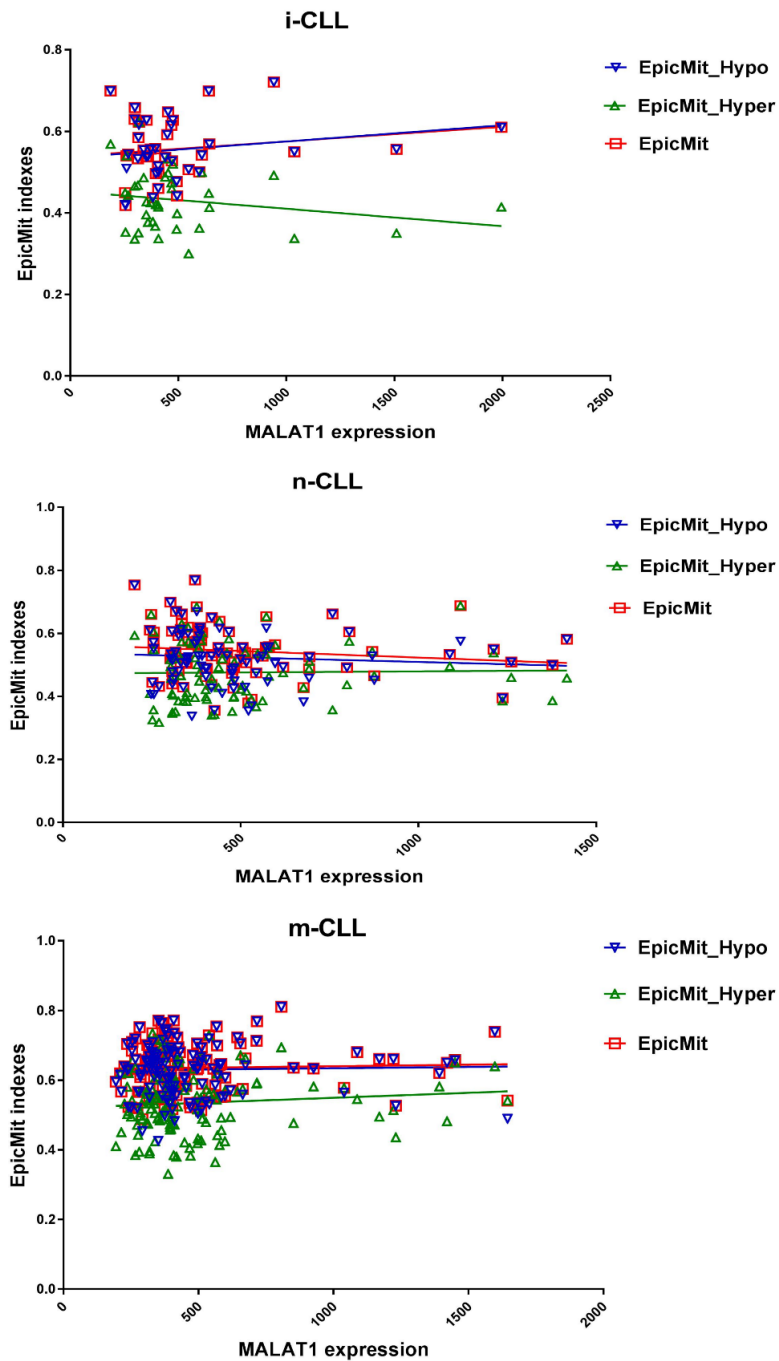

ICGC CLL samples from Duran-Ferrer 2020  
MALAT1 probes (450k data) in genomic coordinates, chr11:65265233-65273940 (hg19)

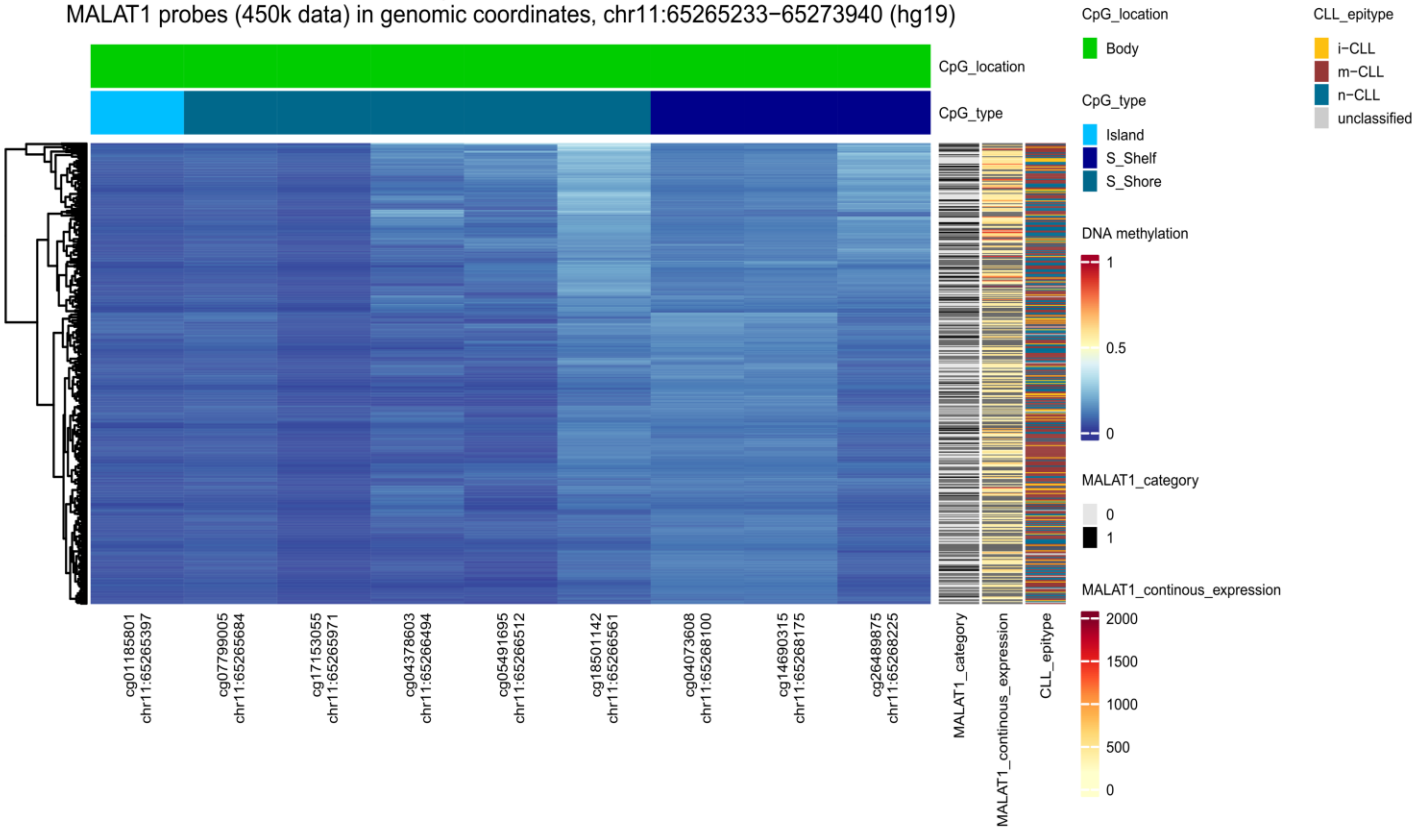

(a)

Enriched pathways in positively correlated genes with MALAT1 (CLL)

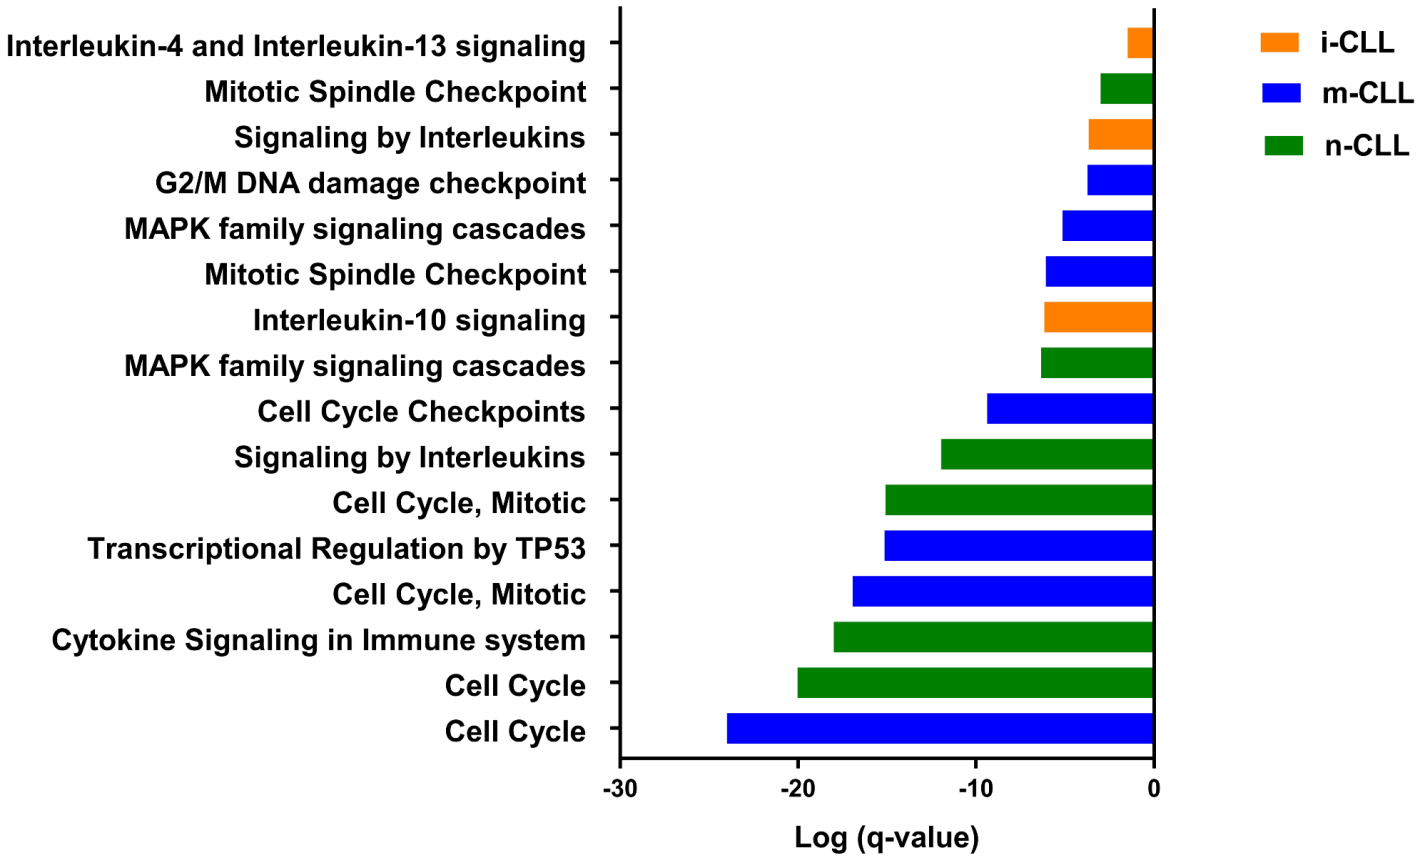

(b)

Enriched pathways in negatively correlated genes with MALAT1 (CLL)

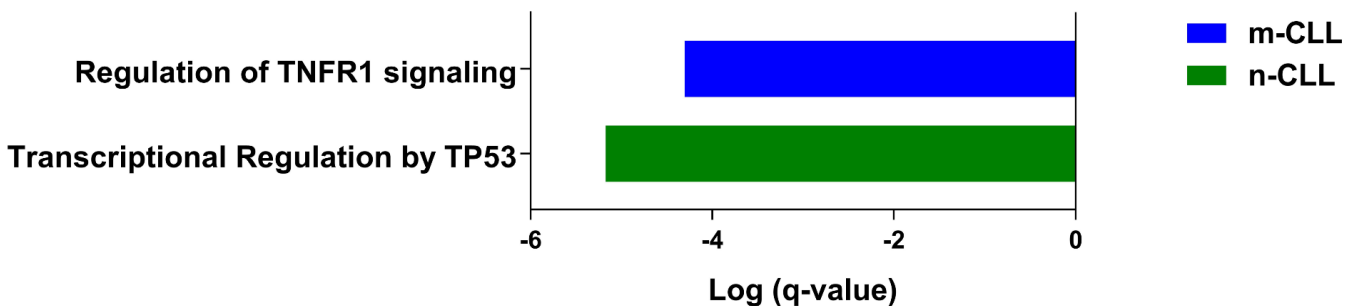





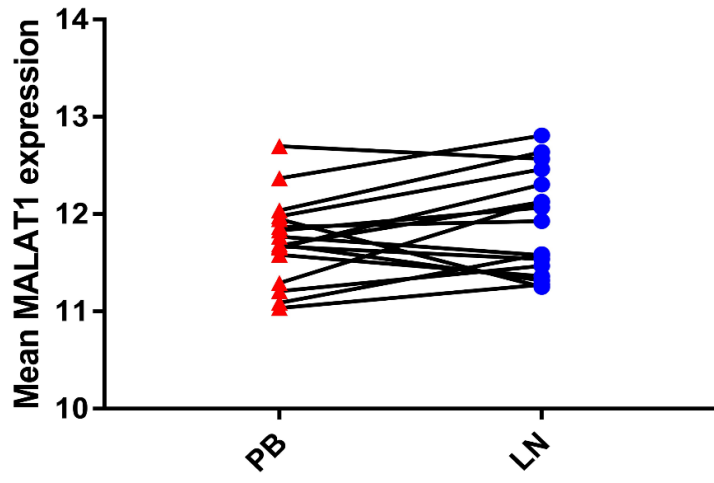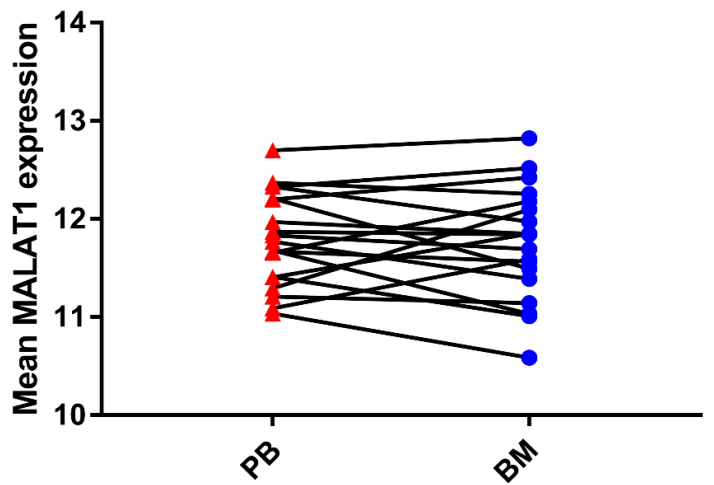

(a)

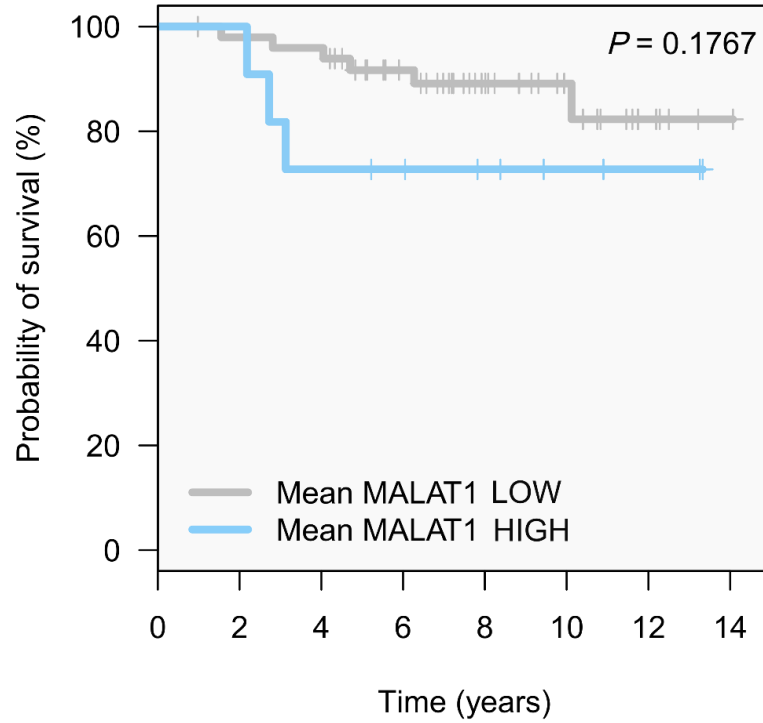

**No. at risk:**

|                  |    |    |    |    |    |    |   |   |
|------------------|----|----|----|----|----|----|---|---|
| Mean MALAT1 LOW  | 50 | 48 | 47 | 36 | 23 | 13 | 5 | 1 |
| Mean MALAT1 HIGH | 11 | 11 | 8  | 7  | 5  | 3  | 2 | 0 |

(b)

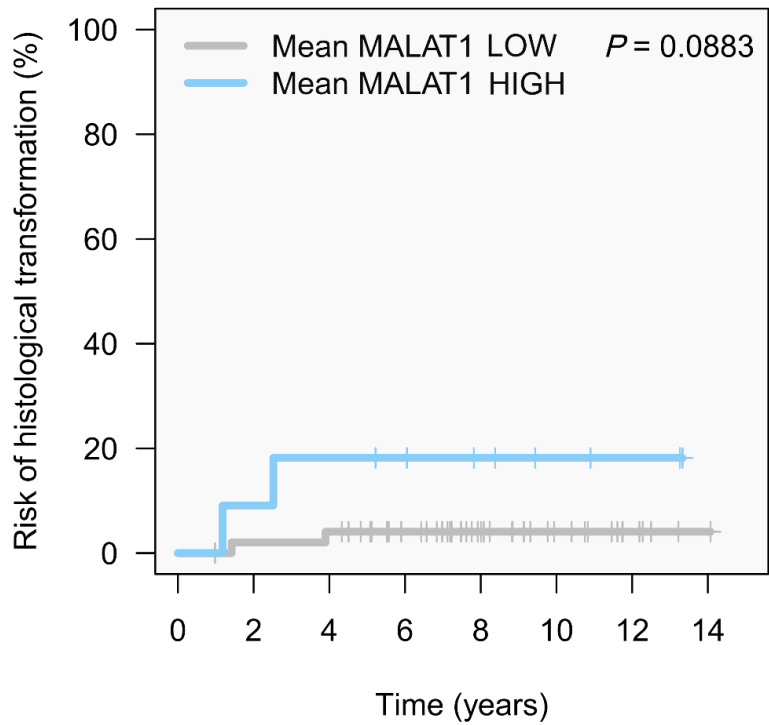

**No. at risk:**

|                  |    |    |    |    |    |    |   |   |
|------------------|----|----|----|----|----|----|---|---|
| Mean MALAT1 LOW  | 50 | 47 | 45 | 36 | 23 | 13 | 5 | 1 |
| Mean MALAT1 HIGH | 11 | 10 | 8  | 7  | 5  | 3  | 2 | 0 |

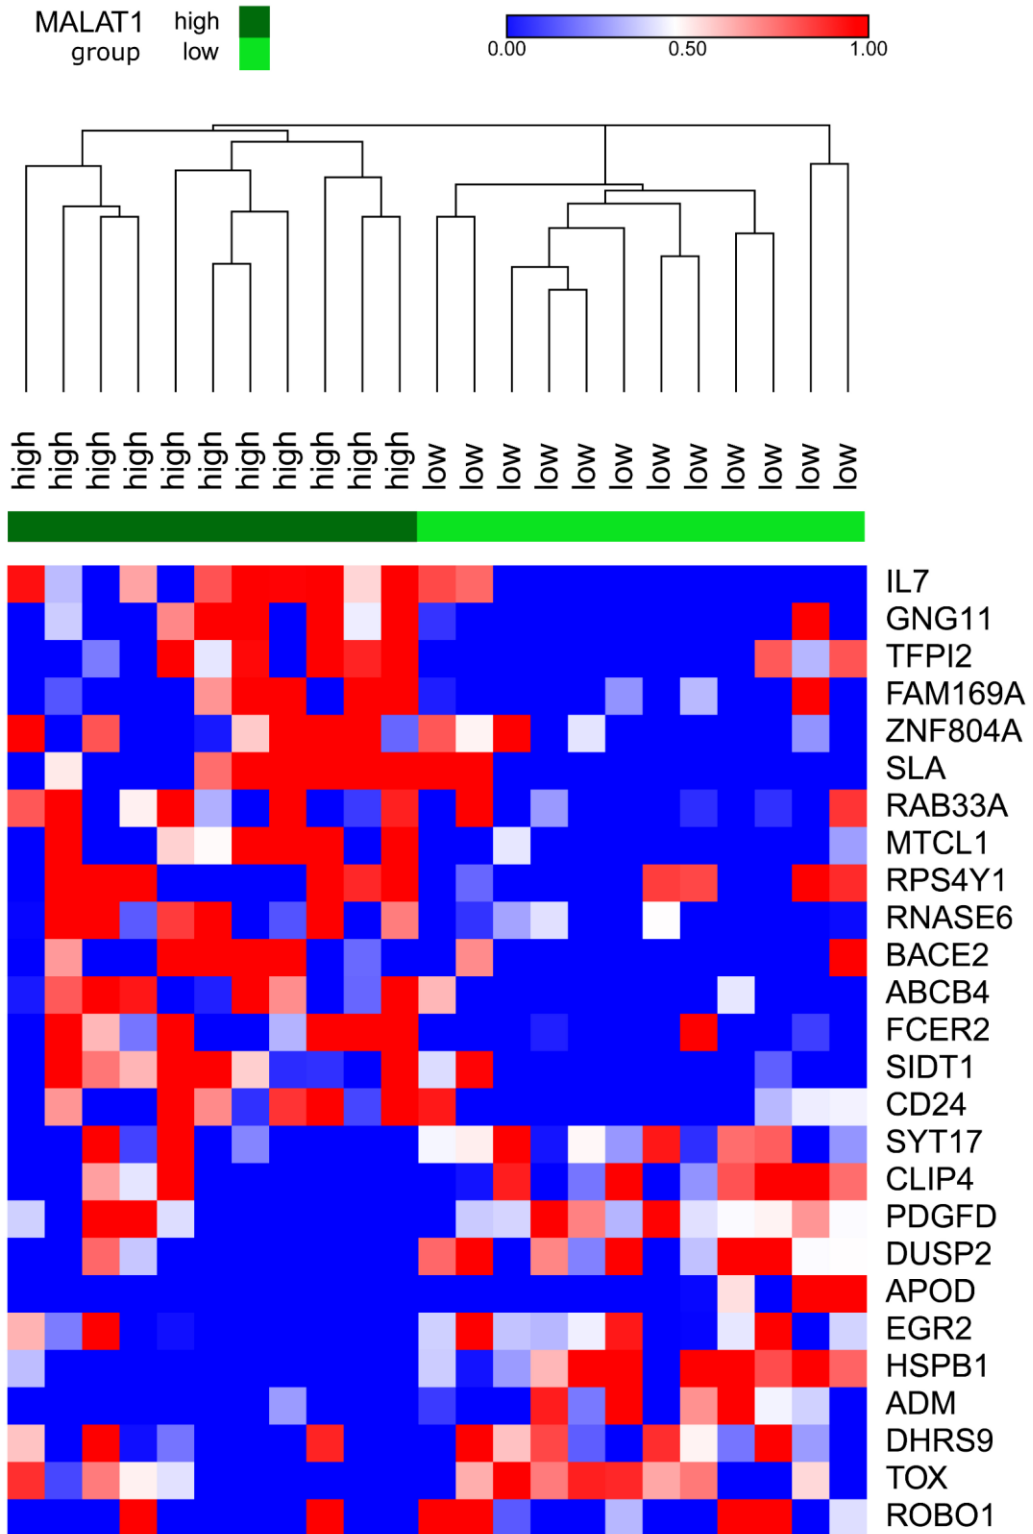

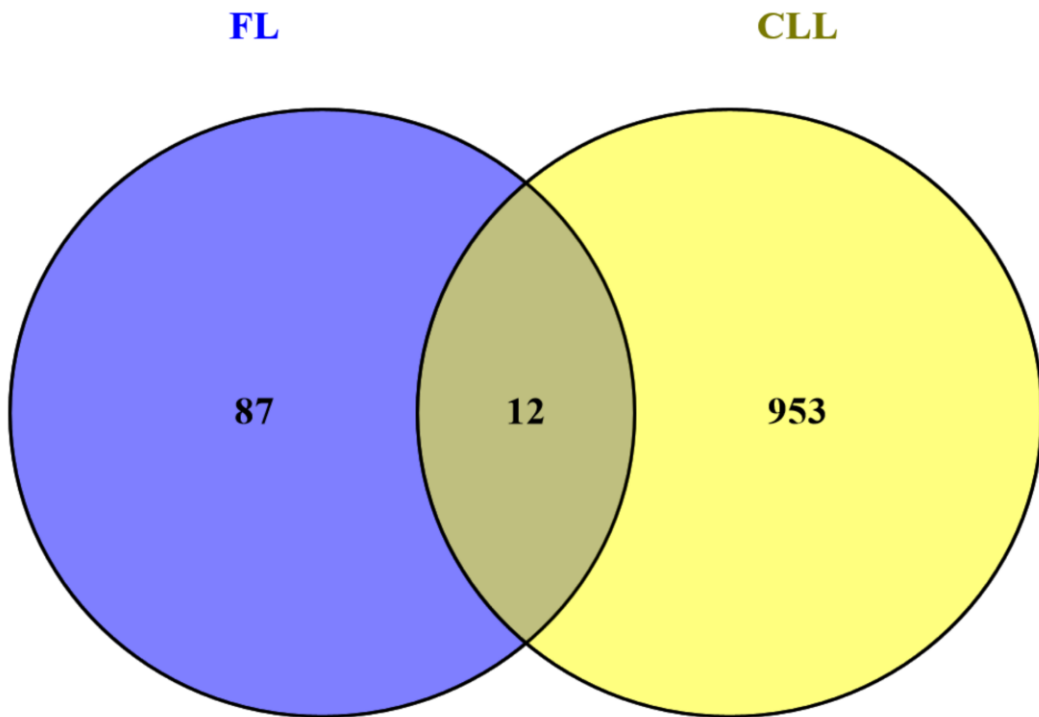

Supplement: 41598_2023_44174_MOESM19_ESM.pdf [file 41598_2023_44174_MOESM19_ESM.pdf]
